# Supplementary material
Source: Springer Nature journal article supplement (https://www.springermedizin.de/resource/supplementary/12978_2013_245_MOESM6_ESM.pdf/9602310)

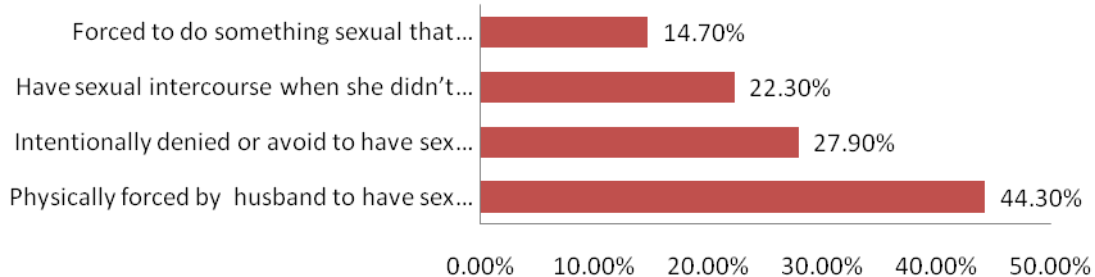

Supplement: MOESM6 [file 9602310]
